# Supplementary material for: Genome-resolved metagenomic analysis of Great Amazon Reef System sponge-associated Latescibacterota bacteria and their potential contributions to the host sponge and reef
Source: Front Microbiomes. 2023 Aug 17;2:1206961. doi: 10.3389/frmbi.2023.1206961 (PMC12993501; doi:10.3389/frmbi.2023.1206961)
Supplement: Supplementary file 4 [file Table_4.xlsx]

## Sheet: Genomic metrics and classificat
	Number of Scaffolds	Size [bp]	Longest Scaffold [bp]	Shortest Scaffold [bp]	N50 [bp]	L50	NG50 [bp]	LG50	GC [%]	Completeness [%]	Contamination[%]	Genes	CDS	rRNA	tRNA	tmRNA	Repeat Regions	GTDB-Tk Taxonomic Classification
Latescibacteria FT14_2_151_60	76	5462990	356540	1118	137738	13	148784	12	60.05	97.74	3.3	4619	4545	17	56	1	4	d_Bacteria; p_Latescibacterota; c_UBA2968; o_UBA8231; f_UBA8231; g_GCA-2724215; s_
Latescibacteria FT14_40_044	214	4933867	125691	1024	51157	31	49703	32	55.86	96.7	0.36	4095	4042	3	49	1	2	d_Bacteria; p_Latescibacterota; c_UBA2968; o_UBA2968; f_UBA2968; g_VXRD01; s_
Latescibacteria FT16_39_61	122	5488755	235622	1006	126379	17	129535	15	60.61	96.64	1.3	4649	4566	19	63	1	3	d_Bacteria; p_Latescibacterota; c_UBA2968; o_UBA8231; f_UBA8231; g_GCA-2724215; s_
Latescibacteria FT39_12_62	254	2593951	81533	1025	15999	43	14152	57	61.97	86.2	0	2210	2172	2	35	1	0	d_Bacteria; p_Latescibacterota; c_UBA2968; o_UBA2968; f_GCA-2709665; g_; s_
Latescibacteria FT39_21_61	497	3225546	39626	1006	10863	83	11963	73	60.95	84.85	1.4	2622	2589	0	32	1	1	d_Bacteria; p_Latescibacterota; c_UBA2968; o_UBA2968; f_GCA-2709665; g_JAAXHW01; s_JAAXHW01 sp012270675
Latescibacteria FT39_27_60	507	3336574	105468	1001	12411	71	14273	58	60.11	73.86	4.4	2801	2756	0	45	0	0	d_Bacteria; p_Latescibacterota; c_UBA2968; o_UBA2968; f_GCA-2709665; g_JAAXHE01; s_JAAXHE01 sp012271065
Latescibacteria FT41_80_57	1027	3416376	31160	1001	3999	262	4488	212	57.23	89.56	1.4	2870	2826	0	44	0	0	d_Bacteria; p_Latescibacterota; c_UBA2968; o_UBA2968; f_UBA2968; g_VXRD01; s_
Latescibacteria FT41_2_97_61	430	4488921	91467	1005	18027	77	20025	64	61.13	97.74	6.59	3724	3648	17	58	1	0	d_Bacteria; p_Latescibacterota; c_UBA2968; o_UBA8231; f_UBA8231; g_GCA-2724215; s_
Latescibacteria FT48_57_60	69	4490256	524568	1023	212125	8	213122	7	59.94	84.45	4.4	3689	3639	3	46	1	2	d_Bacteria; p_Latescibacterota; c_UBA2968; o_UBA2968; f_GCA-2709665; g_;s_
Latescibacteria FT48_77_51	20	3391615	566399	1011	308406	5	315559	4	50.95	71.43	0.3	3036	3002	3	30	1	1	d_Bacteria; p_Latescibacterota; c_UBA2968; o_UBA2968; f_UBA2968; g_VXRD01; s_

## Sheet: MAGs' quality
MAG name	5S rRNA	16S rRNA	23S rRNA	tRNA	Completeness	Contamination	Quality
Latescibacteria FT14_2_151_60	✓	✓	✓	56	97.74 %	3.3 %	High
Latescibacteria FT14_40_044	✓	✓	✓	49	96.7 %	0.36 %	High
Latescibacteria FT16_39_61	✓	✓	✓	63	96.64 %	1.3 %	High
Latescibacteria FT39_12_62	✓	✓	✗	35	86.2 %	0	Medium
Latescibacteria FT39_21_61	✗	✗	✗	32	84.85 %	1.4 %	Medium
Latescibacteria FT39_27_60	✗	✗	✗	45	73.86 %	4.4 %	Medium
Latescibacteria FT41_80_57	✗	✗	✗	44	89.56 %	1.4 %	Medium
Latescibacteria FT41_2_97_61	✓	✓	✓	58	97.74 %	6.59 %	Medium
Latescibacteria FT48_57_60	✓	✓	✓	46	84.45 %	4.4 %	Medium
Latescibacteria FT48_77_51	✓	✓	✓	30	71.43 %	0.3 %	Medium
